# Supplementary material for: Morpholine-functionalized polycarbonate hydrogels for heavy metal ion sequestration
Source: Royal Society of Chemistry journal article supplement (doi:10.1039/c2py20937c), 2012-11-30
Supplement: c2py20937c.pdf [file c2py20937c.pdf]

*Supplementary Information*

## **Morpholine-Functionalized Polycarbonate Hydrogel for Heavy Metal Ion Sequestration**

**Michał Kawalec,<sup>a</sup> Andrew P. Dove,<sup>b</sup> Laetitia Mespouille\*<sup>a</sup> and Philippe Dubois<sup>a</sup>**

<sup>a</sup> *Laboratory of Polymeric and Composite Materials (LPCM), Center of Innovation and Research in Materials and Polymers (CIRMAP), University of Mons (UMONS), 23, Place du Parc, 7000 Mons, Belgium. Fax: +32 653 3484; Tel: +32 6537 3483; E-mail: philippe.dubois@umons.ac.be*

<sup>b</sup> *Department of Chemistry, University of Warwick, Coventry CV4 7AL, U.K. Fax: +44 24 7652 4112; Tel: +44 24 7652 4107; E-mail: a.p.dove@warwick.ac.uk*

*\*corresponding author e-mail: laetitia.mespouille@umons.ac.be*

**Synthesis of ethyl 5-methyl-2-oxo-1,3-dioxane-5-carboxylate (MTC-Et):** the synthesis was performed similarly to<sup>1</sup>; briefly: solution of bis-MPA (22.1 g, 0.165 mol, 1 eq.) in 150 cm<sup>3</sup> of ethanol with 6.8 g of Amberlyst 15 (strongly acidic resin) was refluxed 22 h. Next, the resin was filtered off and ethanol was stripped off. Crude product was dissolved in 200 cm<sup>3</sup> of CH<sub>2</sub>Cl<sub>2</sub> and insoluble part was filtered off. After removal of the solvent colorless, viscous liquid was obtained with yield= 81 %. In second step, into solution of dry ethyl 2,2-bis(methylol)propionate (42.72 g, 264 mmol, 1 eq.) in 800 cm<sup>3</sup> of THF (vigorously stirred and immersed in an ice/ water bath) ethyl chloroformate was added (75 cm<sup>3</sup>, 85.52 g, 788 mmol, 3 eq.) and stirred further 40 min. Next, dry triethylamine (110 cm<sup>3</sup>, 79.8 g, 788 mmol, 3 eq.) was added dropwise over 40 min. After 1.5 h cooling bath was removed and solution stirred overnight at dry nitrogen atmosphere. Next, precipitate was filtered off and THF removed on rotary evaporator. The crude product was dissolved in 100 cm<sup>3</sup> of CH<sub>2</sub>Cl<sub>2</sub> and washed with 2·50 cm<sup>3</sup> 1M HCl<sub>aq.</sub>, 50 cm<sup>3</sup> saturated aq. solution of NaHCO<sub>3</sub>, 25 cm<sup>3</sup> of brine and 25 cm<sup>3</sup> of aq. dist. Next, organic phase was dried over MgSO<sub>4</sub> and solvent was stripped off after MgSO<sub>4</sub> filtering off. Obtained yellow liquid crystallized after 4 h in a freezer. The product was recrystallized from ethyl acetate until white crystals were obtained. Yield= 24 %.

### Synthesis of poly(ethyl 5-methyl-2-oxo-1,3-dioxane-5-carboxylate)-based hydrogel:

Polymerization was carried out similarly to synthesis of P(MTC-Morph)-based hydrogels using MTC-Et (0.1 g, 0.532 mmol, 90 eq.), MTC-PEO-MTC (0.13 g, 0.059 mmol, 10 eq.) and TU (0.0236 g, 0.064 mmol, 11 eq.) in 0.5 g of dry CH<sub>2</sub>Cl<sub>2</sub> was prepared in one vial, and a solution of benzyl 2,2-bis(methylol) propionate (0.0013 g, 0.006 mmol, 1.0 eq.) and DBU (0.0090 g, 0.058 mmol; 10 eq.) in 0.27 g of dry CH<sub>2</sub>Cl<sub>2</sub>. After purification, obtained flexible, transparent, colorless monoblock of gel fraction equaled 78 %.

- 1 K. Fukushima, R. C. Pratt, F. Nederberg, J. P. K. Tan, Y. Yan Yang, R. M. Waymouth, J. L. Hedrick, *Biomacromolecules*, 2008, **9**, 3051.

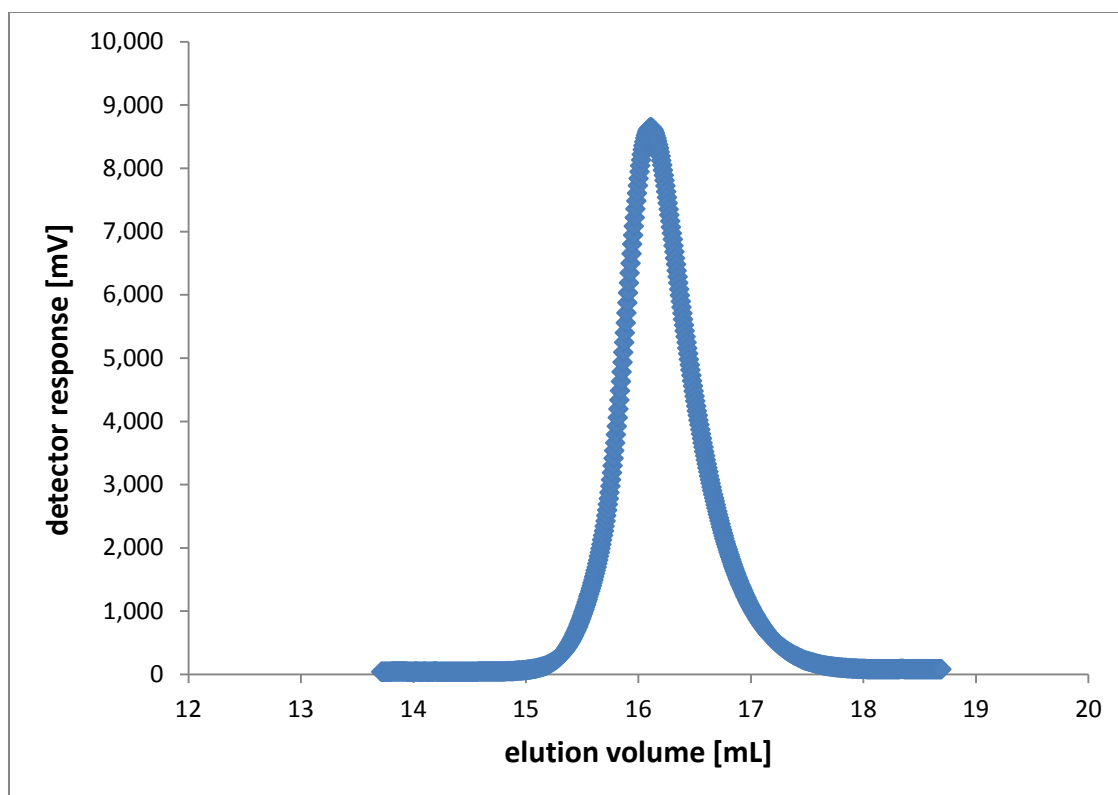

**Figure S1.** SEC (THF+ 2 % triethylamine) trace of the obtained MeOPEO<sub>2k</sub>-P(MTC-Morph) copolymer (Table 1, Entry 2)

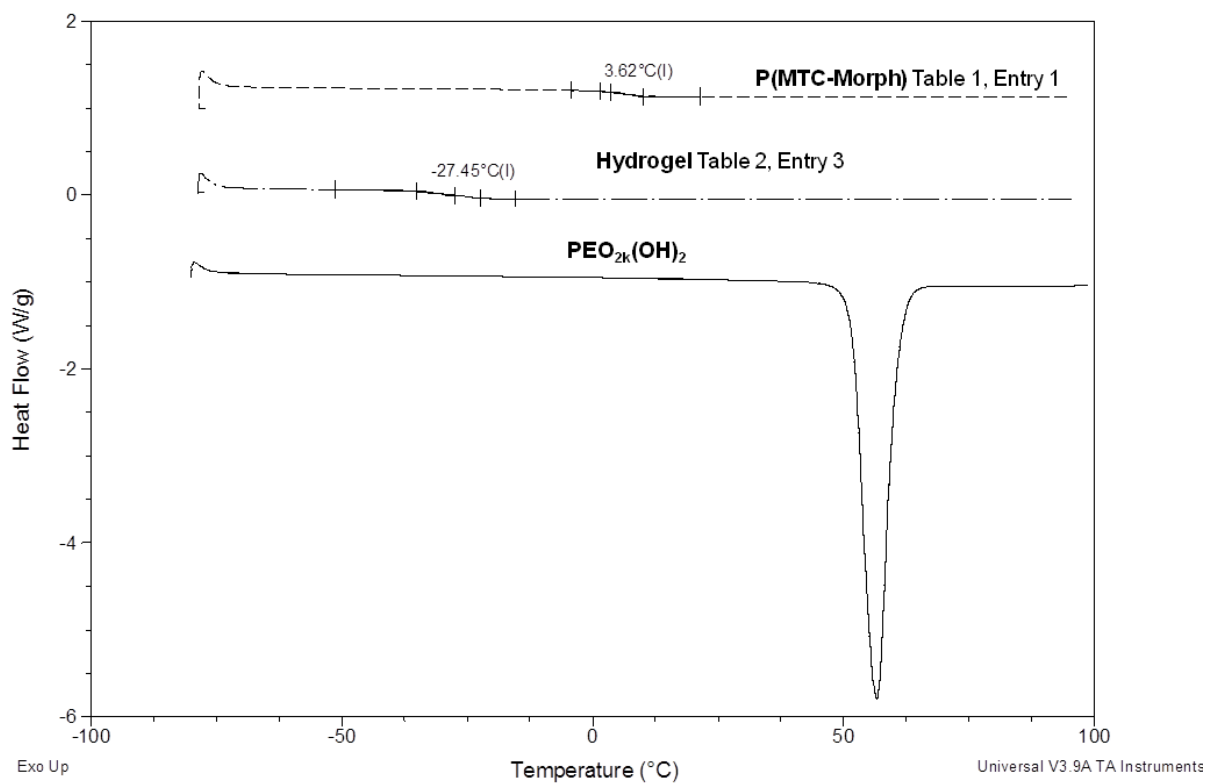

**Figure S2.** DSC curves of synthesized P(MTC-Morph) (2<sup>nd</sup> heating cycle), hydrogel with 10% cross-linker (2<sup>nd</sup> heating cycle) and initial PEO<sub>2k</sub>(OH)<sub>2</sub> (1<sup>st</sup> heating cycle), heating rate: 10 °C·min<sup>-1</sup>

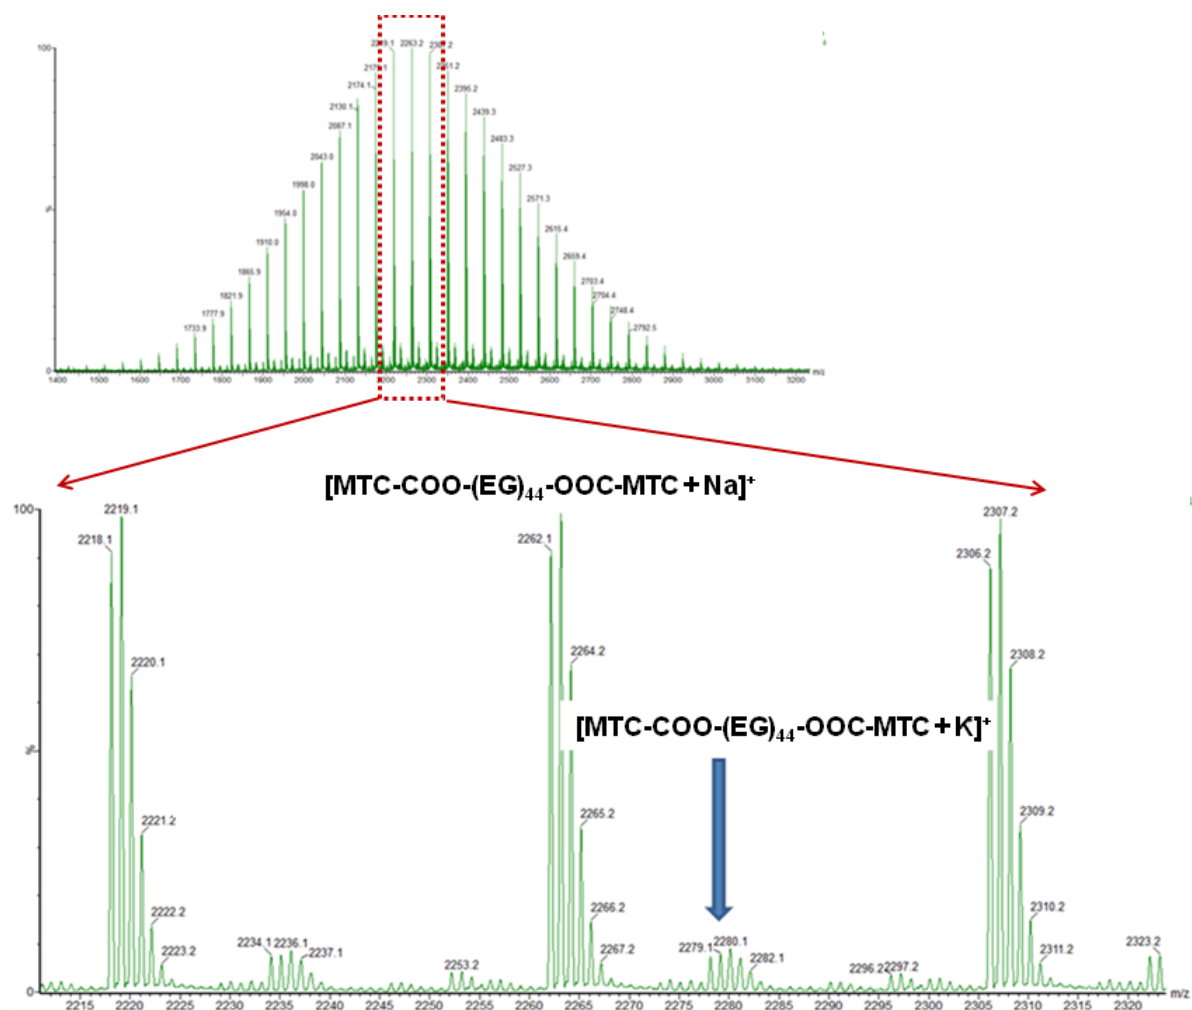

**Figure S3.** MALDI-ToF MS spectrum of MTC-PEO-MTC cross-linker after treatment with TMSD

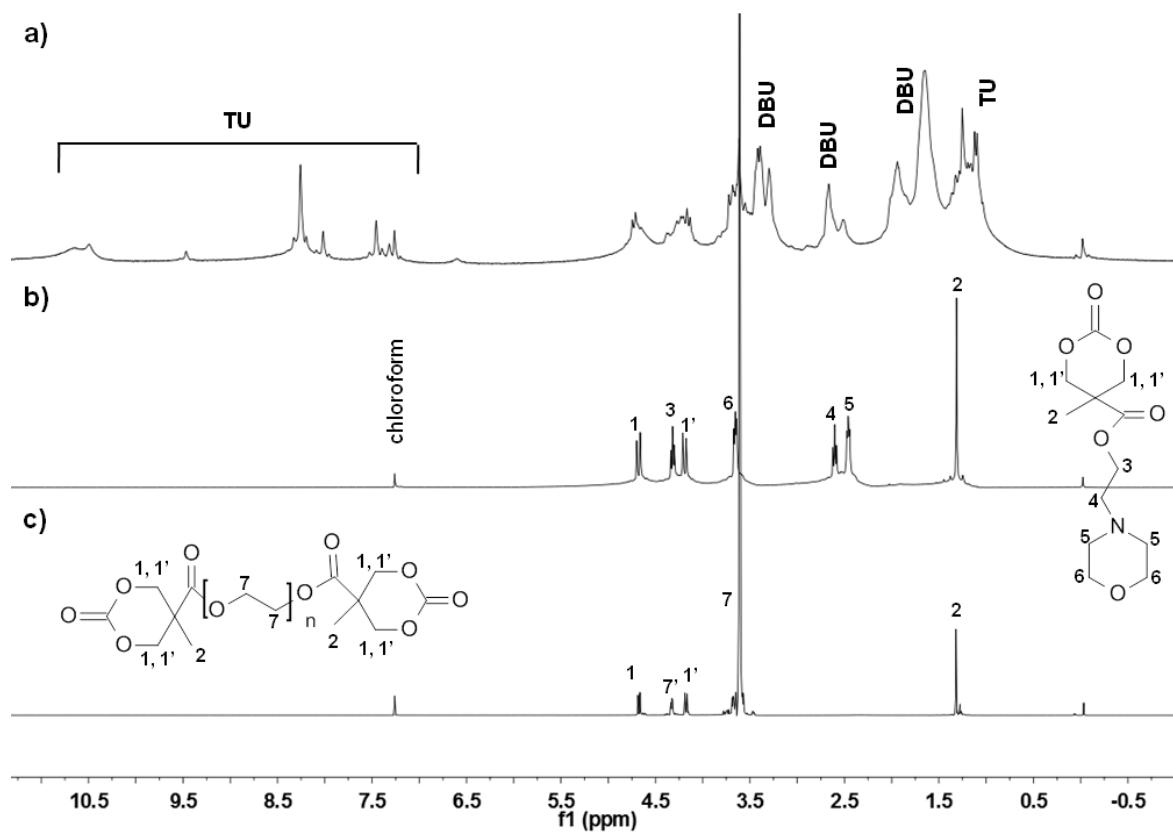

**Figure S4.** <sup>1</sup>H NMR (300 MHz, CDCl<sub>3</sub>) spectra overlay of soluble residue extracted from *net*-P(MTC-Morph-co-PEO) (10% PEO; Table 2, Entry 3) (a), MTC-Morph (b) and <sup>1</sup>H NMR spectrum (500 MHz, CDCl<sub>3</sub>) of MTC-PEO-MTC cross-linker (c)
